# Supplementary material
Source: Springer Nature journal article supplement (https://www.springermedizin.de/resource/supplementary/12885_2012_3696_MOESM2_ESM.pdf/9465590)

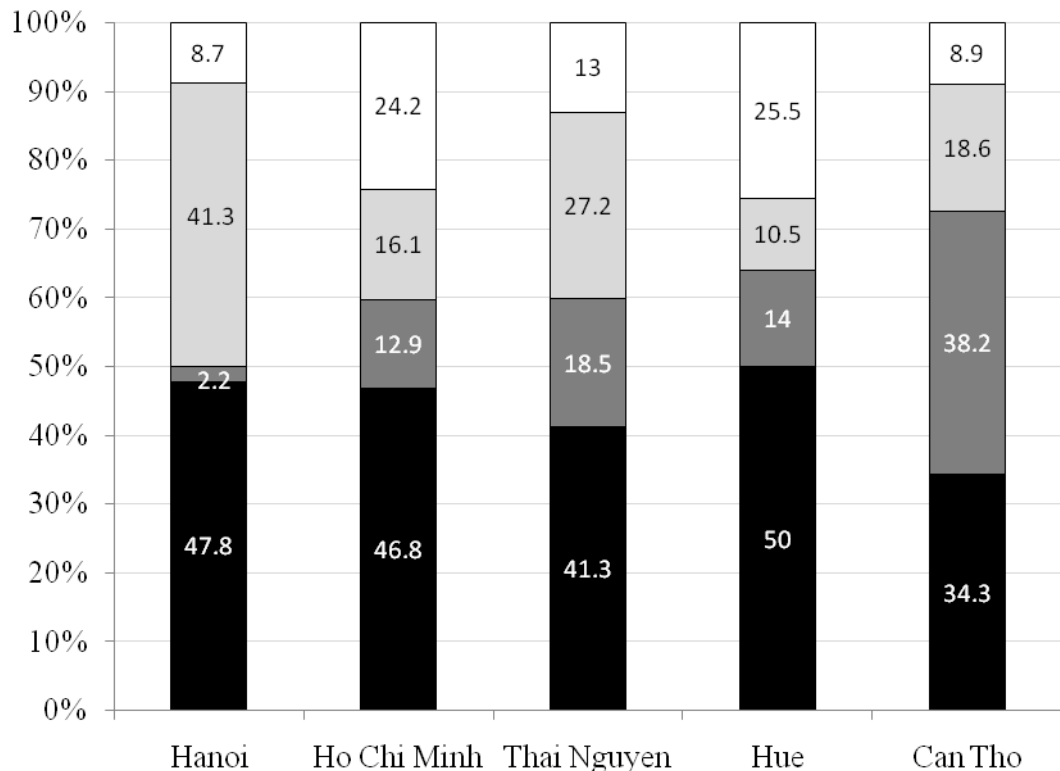

□ Low risk HPV

■ HPV 16/18 and other high risk

□ Other high risk

■ Only 16 and/or 18

Supplement: MOESM2 [file 9465590]
